# Supplementary material for: Hydrothermal synthesis, evolution, and electrochemical performance of LiMn0.5Fe0.5PO4 nanostructures
Source: Royal Society of Chemistry journal article supplement (doi:10.1039/c5cp02665b), 2015-01-01
Supplement: c5cp02665b1.pdf [file c5cp02665b1.pdf]

## **Electronic Supplementary Information**

---

### **Hydrothermal synthesis, Evolution, and Electrochemical**

### **Performance of $\text{LiMn}_{0.5}\text{Fe}_{0.5}\text{PO}_4$ Nanostructures**

Wei Xiang,<sup>a</sup> Yan-Jun Zhong,<sup>a</sup> Jun-Yi Ji,<sup>a</sup> Yan Tang,<sup>b</sup> Hui-Hui Shen,<sup>a</sup> Xiao-Dong Guo<sup>a,c</sup>, Ben-He Zhong<sup>a</sup>, Shi Xue Dou<sup>c</sup> and Zhi-Ye Zhang<sup>a\*</sup>

<sup>a</sup> College of Chemical Engineering, Sichuan University, Chengdu 610065, PR China

<sup>b</sup> College of Materials Science and Engineering, Sichuan University, Chengdu 610065, PR China

<sup>c</sup> Institute for Superconducting and Electronic Materials, University of Wollongong, Wollongong, NSW 2522, Australia

\* Corresponding author. E-mail: nic1201@163.com.

## Supplementary Figures

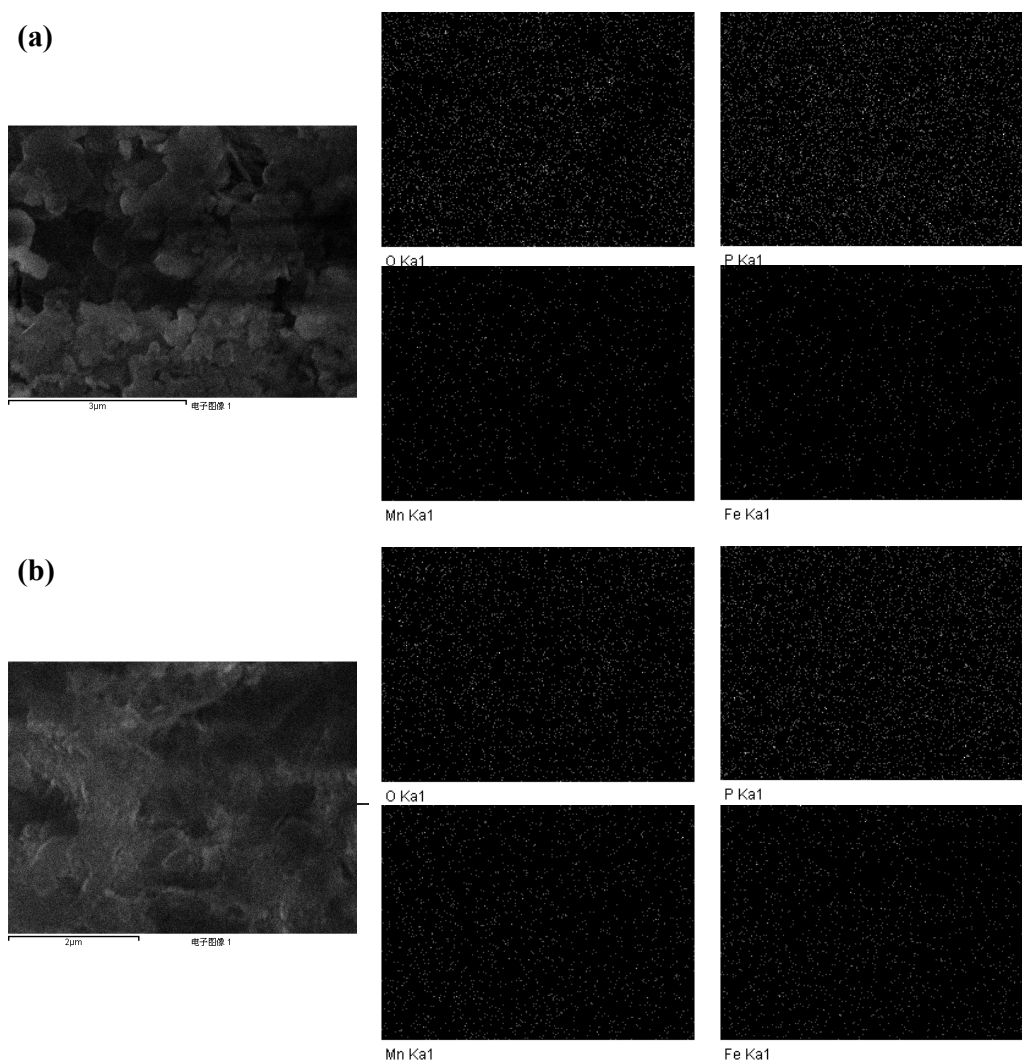

**Fig. S1** EDS maps of Fe, Mn, P, O of the intermediates extracted at (a)30 °C and (b)100 °C.

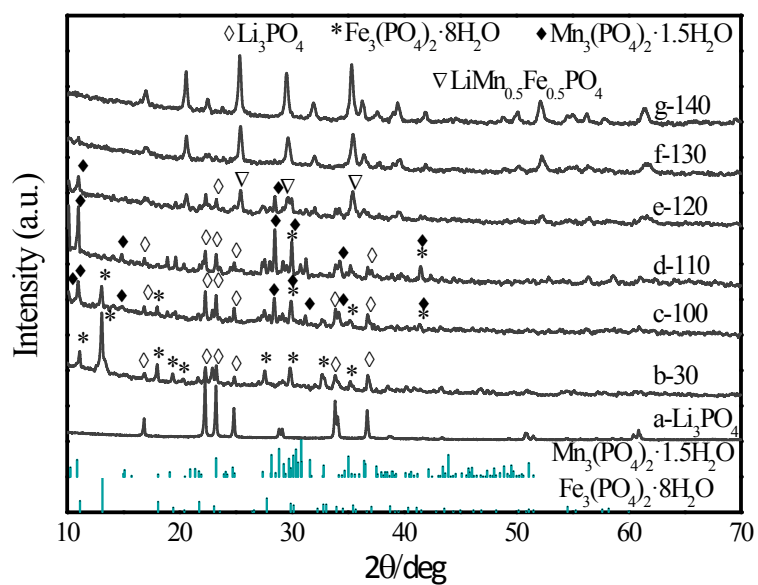

**Fig. S2** XRD pattern of (a) $\text{Li}_3\text{PO}_4$  and the intermediate extracted at (b)30 °C, (c)100 °C, (d)110 °C, (e)120 °C, (f)130 °C, (g)135 °C, (h)140 °C during the temperature rise period with resultant concentration of precursor at 0.25mol L<sup>-1</sup>.

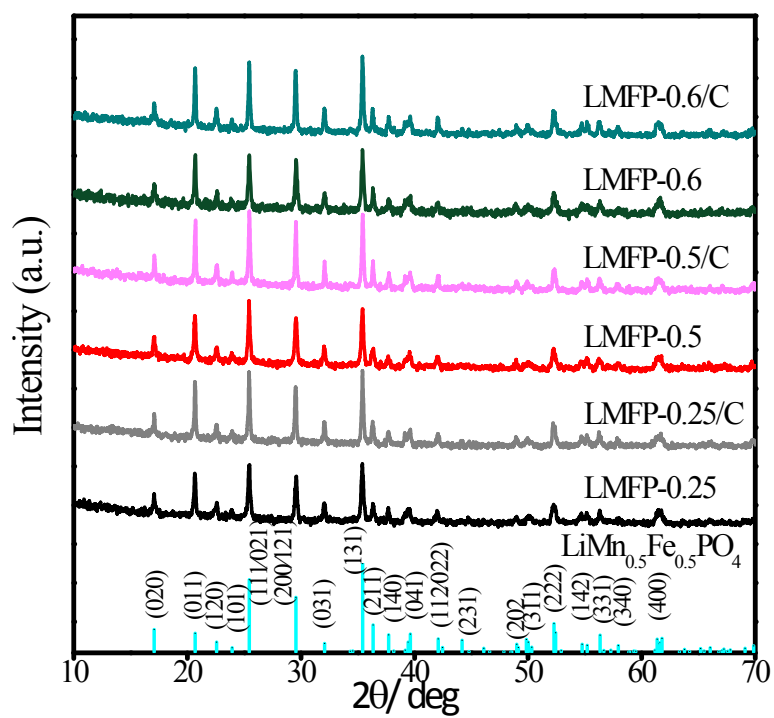

**Fig. S3** XRD pattern of LMFP samples synthesized under three different resultant concentration of precursor and corresponding carbon coated samples.

## Supplementary Table

**Table S1** Rietveld refinement results of the XRD pattern of intermediate extracted during soaking period

| Intermediate | a(Å) ±0.0002 | b(Å) ±0.0002 | c(Å) ±0.0002 | V(Å <sup>3</sup> ) ±0.002 |
|--------------|--------------|--------------|--------------|---------------------------|
| 0min         | 4.7271       | 10.4057      | 6.0501       | 297.597                   |
| 10min        | 4.7251       | 10.4012      | 6.0486       | 297.269                   |
| 60min        | 4.7214       | 10.3870      | 6.0443       | 296.420                   |
| 600min       | 4.7199       | 10.3784      | 6.0308       | 295.419                   |

**Table S2** Atomic composition of LMFP-0.25/C, LMFP-0.5/C and LMFP-0.25/C

| sample      | atomic composition (Li:Mn:Fe:P) |
|-------------|---------------------------------|
| LMFP-0.25/C | 0.93:0.52:0.55:1                |
| LMFP-0.5/C  | 0.95:0.52:0.57:1                |
| LMFP-0.6/C  | 0.91:0.51:0.58:1                |
